# Supplementary material for: Paternal Age Amplifies Cryopreservation-Induced Stress in Human Spermatozoa
Source: MDPI journal article supplement (doi:10.3390/cells13070625), 2024-04-04
Supplement: s1 [file s1]

**Supplementary Table S1.** List of antibodies used in this study.

| Antigen              | Donor Species | Dilution |        | Manufacturer             | RRID      |
|----------------------|---------------|----------|--------|--------------------------|-----------|
|                      |               | IF       | WB     |                          |           |
| Primary antibodies   |               |          |        |                          |           |
| P-Tyr                | Mouse         | 1:50     | 1:250  | Santa Cruz Biotechnology | AB_628123 |
| Tubulin              | Mouse         | -        | 1:1000 | Sigma Aldrich            | AB_628123 |
| Secondary antibodies |               |          |        |                          |           |
| Anti-Mouse IgM FITC  | Goat          | 1:400    | -      | Sigma Life Science       | AB_259799 |
| Anti-Mouse-IgG HRP   | Goat          | -        | 1:2000 | Bio-Rad Laboratories     | AB_609692 |
